# Supplementary material for: The Long-Term Effectiveness of Omalizumab in Adult Patients with Severe Allergic Asthma: Continuous Treatment Versus Boosting Treatment
Source: MDPI journal article supplement (doi:10.3390/jcm10040707), 2021-02-11
Supplement: s1 [file s1]

**Table S1.** Changes in the asthma control, frequency of oral corticosteroid use as controllers and inhaled maintenance pharmacological therapies, monthly oral corticosteroid maintenance dose, and exacerbation frequency after Omalizumab treatment.

|                                                        | Baseline          | Follow-Up         | Change from Baseline |
|--------------------------------------------------------|-------------------|-------------------|----------------------|
| <b>Continuation (n = 110)</b>                          |                   |                   |                      |
| <b>Number of exacerbation</b>                          |                   |                   |                      |
| Number of patients evaluated                           | 110 (100%)        | 110 (100%)        | 110 (100%)           |
| Mean ± SD                                              | 0.8 ± 1.5         | 0.5 ± 1.0         | -0.3 ± 1.4           |
| Median (Q1, Q3)                                        | 0.0 (0.0, 1.0)    | 0.0 (0.0, 1.0)    | 0.0 (0.0, 0.0)       |
| Persistent presence                                    | NA                | NA                | 14 (12.7%)           |
| Complete prevention                                    | NA                | NA                | 18 (16.4%)           |
| Occurrence from nil                                    | NA                | NA                | 17 (15.5%)           |
| Never present                                          | NA                | NA                | 61 (55.5%)           |
| <b>Use of OCS as controller</b>                        | 36 (32.7%)        | 22 (20.0%)        | -14 (-12.7%)         |
| <b>OCS maintenance dose (mg per month)<sup>†</sup></b> |                   |                   |                      |
| Number of patients evaluated                           | 110 (100%)        | 110 (100%)        | 110 (100%)           |
| Mean ± SD                                              | 85.9 ± 180.8      | 45.8 ± 106.6      | -40.1 ± 178.3        |
| Median (Q1, Q3)                                        | 0.0 (0.0, 140.0)  | 0.0 (0.0, 0.0)    | 0.0 (0.0, 0.0)       |
| <b>ACT</b>                                             |                   |                   |                      |
| Number of patients evaluated                           | 81 (73.6%)        | 76 (69.1%)        | 76 (69.1%)           |
| Mean ± SD                                              | 15.9 ± 3.1        | 19.8 ± 4.4        | 3.8 ± 4.6            |
| Median (Q1, Q3)                                        | 17.0 (14.0, 19.0) | 21.0 (17.0, 23.8) | 4.0 (1.0, 7.0)       |
| ≥3 (Responder)                                         | NA                | NA                | 47 (61.8%)           |
| <3 (Non-responder)                                     | NA                | NA                | 29 (38.2%)           |
| <b>Inhaled maintenance pharmacological therapy</b>     |                   |                   |                      |
| Medium-dose ICS/LABA +/- Tiotropium                    | 46 (41.8%)        | 52 (47.3%)        | 6 (4.8%)             |
| High-dose ICS/LABA +/- Tiotropium                      | 64 (58.2%)        | 58 (52.7%)        | -6 (-4.8%)           |
| <b>Boost (n = 14)</b>                                  |                   |                   |                      |
| <b>Number of exacerbation</b>                          |                   |                   |                      |
| Number of patients evaluated                           | 14 (100%)         | 14 (100%)         | 14 (100%)            |
| Mean ± SD                                              | 0.7 ± 1.4         | 2.9 ± 3.6         | 2.1 ± 3.7            |
| Median (Q1, Q3)                                        | 0.0 (0.0, 0.8)    | 2.0 (0.0, 4.0)    | 2.0 (0.0, 4.0)       |
| Persistent presence                                    | NA                | NA                | 2 (14.3%)            |
| Complete prevention                                    | NA                | NA                | 1 (7.1%)             |
| Occurrence from nil                                    | NA                | NA                | 7 (50.0%)            |
| Never present                                          | NA                | NA                | 4 (28.6%)            |
| <b>Use of OCS as controller</b>                        | 7 (50.0%)         | 3 (21.4%)         | -4 (-28.6%)          |
| <b>OCS maintenance dose (mg per month)<sup>†</sup></b> |                   |                   |                      |
| Number of patients evaluated                           | 14 (100%)         | 14 (100%)         | 14 (100%)            |
| Mean ± SD                                              | 171.4 ± 221.5     | 50.0 ± 104.3      | -121.4 ± 219.6       |
| Median (Q1, Q3)                                        | 70.0 (0.0, 280.0) | 0.0 (0.0, 35.0)   | -70.0 (-280.0, 0.0)  |
| <b>ACT</b>                                             |                   |                   |                      |
| Number of patients evaluated                           | 12 (85.7%)        | 9 (64.3%)         | 9 (64.3%)            |
| Mean ± SD                                              | 13.9 ± 3.9        | 19.7 ± 4.7        | 5.1 ± 5.4            |
| Median (Q1, Q3)                                        | 15.0 (14.0, 16.8) | 21.0 (15.0, 23.5) | 7.0 (-1.0, 8.0)      |
| ≥3 (Responder)                                         | NA                | NA                | 6 (66.7%)            |
| <3 (Non-responder)                                     | NA                | NA                | 3 (33.3%)            |
| <b>Inhaled maintenance pharmacological therapy</b>     |                   |                   |                      |
| Medium-dose ICS/LABA +/- Tiotropium                    | 7 (50.0%)         | 8 (57.1%)         | 1 (0.8%)             |
| High-dose ICS/LABA +/- Tiotropium                      | 7 (50.0%)         | 6 (42.9%)         | -1 (-0.8%)           |
| <b>Total (n = 124)</b>                                 |                   |                   |                      |
| <b>Number of exacerbation</b>                          |                   |                   |                      |

|                                                        |                   |                   |                   |
|--------------------------------------------------------|-------------------|-------------------|-------------------|
| Number of patients evaluated                           | 124 (100%)        | 124 (100%)        | 124 (100%)        |
| Mean $\pm$ SD                                          | 0.8 $\pm$ 1.5     | 0.8 $\pm$ 1.7     | 0.0 $\pm$ 1.9     |
| Median (Q1, Q3)                                        | 0.0 (0.0, 1.0)    | 0.0 (0.0, 1.0)    | 0.0 (0.0, 0.0)    |
| Persistent presence                                    | NA                | NA                | 16 (12.9%)        |
| Complete prevention                                    | NA                | NA                | 19 (15.3%)        |
| Occurrence from nil                                    | NA                | NA                | 24 (19.4%)        |
| Never present                                          | NA                | NA                | 65 (52.4%)        |
| <b>Use of OCS as controller</b>                        | 43 (34.7%)        | 25 (20.2%)        | -18 (-14.5%)      |
| <b>OCS maintenance dose (mg per month)<sup>†</sup></b> |                   |                   |                   |
| Number of patients evaluated                           | 124 (100%)        | 124 (100%)        | 124 (100%)        |
| Mean $\pm$ SD                                          | 95.6 $\pm$ 186.8  | 46.3 $\pm$ 105.9  | -49.3 $\pm$ 184.2 |
| Median (Q1, Q3)                                        | 0.0 (0.0, 140.0)  | 0.0 (0.0, 0.0)    | 0.0 (-96.3, 0.0)  |
| <b>ACT</b>                                             |                   |                   |                   |
| Number of patients evaluated                           | 93 (75.0%)        | 85 (68.5%)        | 85 (68.5%)        |
| Mean $\pm$ SD                                          | 15.6 $\pm$ 3.3    | 18.8 $\pm$ 4.4    | 4.0 $\pm$ 4.7     |
| Median (Q1, Q3)                                        | 16.0 (14.0, 18.0) | 21.0 (17.0, 23.5) | 4.0 (0.5, 7.0)    |
| $\geq 3$ (Responder)                                   | NA                | NA                | 53 (62.4%)        |
| $< 3$ (Non-responder)                                  | NA                | NA                | 32 (37.6%)        |
| <b>Inhaled maintenance pharmacological therapy</b>     |                   |                   |                   |
| Medium-dose ICS/LABA +/- Tiotropium                    | 53 (42.7%)        | 60 (48.4%)        | 7 (5.6%)          |
| High-dose ICS/LABA +/- Tiotropium                      | 71 (57.3%)        | 64 (51.6%)        | -7 (-5.6%)        |

<sup>†</sup>The steroid dose was converted to equivalent dose of prednisone. Abbreviations: ACT, asthma control test; ICS, inhaled corticosteroid; LABA, long-acting beta-agonist; NA, not applicable; OCS, oral corticosteroid; Q, quartile; SD, standard deviation.

**Table S2.** Changes in the lung function after Omalizumab treatment.

|                                       | Baseline          | Follow-Up          | Change from Baseline |
|---------------------------------------|-------------------|--------------------|----------------------|
| <b>Continuation (n = 110)</b>         |                   |                    |                      |
| <b>Pre-BT FEV1/FVC (%)</b>            |                   |                    |                      |
| Number of patients evaluated          | 85 (77.3%)        | 84 (76.4%)         | 68 (61.8%)           |
| Mean $\pm$ SD                         | 64.1 $\pm$ 14.2   | 63.8 $\pm$ 13.9    | -1.0 $\pm$ 7.8       |
| Median (Q1, Q3)                       | 64.0 (55.0, 73.0) | 64.0 (53.0, 72.0)  | -0.5 (-5.0, 4.8)     |
| <b>Pre-BT FEV1 (L)</b>                |                   |                    |                      |
| Number of patients evaluated          | 85 (77.3%)        | 84 (76.4%)         | 68 (61.8%)           |
| Mean $\pm$ SD                         | 1.8 $\pm$ 0.8     | 1.9 $\pm$ 0.8      | 0.0 $\pm$ 0.3        |
| Median (Q1, Q3)                       | 1.7 (1.1, 2.3)    | 1.7 (1.2, 2.4)     | 0.0 (-0.2, 0.2)      |
| <b>Pre-BT FEV1 % predicted</b>        |                   |                    |                      |
| Number of patients evaluated          | 85 (77.3%)        | 84 (76.4%)         | 68 (61.8%)           |
| Mean $\pm$ SD                         | 65.8 $\pm$ 21.7   | 69.4 $\pm$ 21.9    | 1.3 $\pm$ 11.3       |
| Median (Q1, Q3)                       | 64.0 (47.5, 80.5) | 71.5 (52.3, 83.8)  | 0.0 (-7.8, 9.0)      |
| <b>Pre-BT FVC (L)</b>                 |                   |                    |                      |
| Number of patients evaluated          | 85 (77.3%)        | 84 (76.4%)         | 68 (61.8%)           |
| Mean $\pm$ SD                         | 2.7 $\pm$ 0.9     | 2.9 $\pm$ 1.0      | 0.1 $\pm$ 0.4        |
| Median (Q1, Q3)                       | 2.7 (2.0, 3.3)    | 2.8 (2.2, 3.5)     | 0.0 (-0.2, 0.3)      |
| <b>Pre-BT FVC % predicted</b>         |                   |                    |                      |
| Number of patients evaluated          | 85 (77.3%)        | 84 (76.4%)         | 68 (61.8%)           |
| Mean $\pm$ SD                         | 84.2 $\pm$ 20.9   | 88.1 $\pm$ 19.4    | 2.4 $\pm$ 12.5       |
| Median (Q1, Q3)                       | 84.0 (68.5, 97.5) | 89.0 (76.8, 100.0) | 1.5 (-5.8, 9.5)      |
| <b>Pre-BT FEF<sub>25-75</sub> (%)</b> |                   |                    |                      |
| Number of patients evaluated          | 85 (77.3%)        | 84 (76.4%)         | 68 (61.8%)           |
| Mean $\pm$ SD                         | 54.2 $\pm$ 11.6   | 58.9 $\pm$ 9.1     | 4.3 $\pm$ 5.3        |
| Median (Q1, Q3)                       | 56.0 (45.5, 66.0) | 60.0 (54.0, 66.0)  | 4.0 (0.0, 6.8)       |

|                                       |                   |                    |                   |
|---------------------------------------|-------------------|--------------------|-------------------|
| <b>Boost (n = 14)</b>                 |                   |                    |                   |
| <b>Pre-BT FEV1/FVC (%)</b>            |                   |                    |                   |
| Number of patients evaluated          | 12 (85.7%)        | 9 (64.3%)          | 7 (50.0%)         |
| Mean ± SD                             | 63.1 ± 14.2       | 61.3 ± 10.9        | -1.4 ± 11.0       |
| Median (Q1, Q3)                       | 68.5 (46.8, 75.0) | 57.0 (54.0, 69.5)  | -2.0 (-13.0, 8.0) |
| <b>Pre-BT FEV1 (L)</b>                |                   |                    |                   |
| Number of patients evaluated          | 12 (85.7%)        | 9 (64.3%)          | 7 (50.0%)         |
| Mean ± SD                             | 1.6 ± 0.7         | 1.7 ± 0.5          | 0.1 ± 0.4         |
| Median (Q1, Q3)                       | 1.6 (1.1, 2.1)    | 1.6 (1.2, 2.0)     | -0.1 (-0.2, 0.6)  |
| <b>Pre-BT FEV1 % predicted</b>        |                   |                    |                   |
| Number of patients evaluated          | 12 (85.7%)        | 9 (64.3%)          | 7 (50.0%)         |
| Mean ± SD                             | 67.3 ± 27.8       | 72.8 ± 25.7        | 2.1 ± 18.3        |
| Median (Q1, Q3)                       | 67.5 (44.8, 74.0) | 64.0 (55.5, 91.5)  | -6.0 (-7.0, 23.0) |
| <b>Pre-BT FVC (L)</b>                 |                   |                    |                   |
| Number of patients evaluated          | 12 (85.7%)        | 9 (64.3%)          | 7 (50.0%)         |
| Mean ± SD                             | 2.5 ± 0.8         | 2.7 ± 0.9          | 0.3 ± 0.5         |
| Median (Q1, Q3)                       | 2.6 (1.7, 3.1)    | 2.7 (2.0, 3.5)     | 0.2 (-0.3, 0.8)   |
| <b>Pre-BT FVC % predicted</b>         |                   |                    |                   |
| Number of patients evaluated          | 12 (85.7%)        | 9 (64.3%)          | 7 (50.0%)         |
| Mean ± SD                             | 86.0 ± 33.8       | 96.6 ± 39.1        | 7.0 ± 17.4        |
| Median (Q1, Q3)                       | 75.5 (68.8, 84.0) | 85.0 (69.0, 110.5) | 8.0 (-7.0, 22.0)  |
| <b>Pre-BT FEF<sub>25-75</sub> (%)</b> |                   |                    |                   |
| Number of patients evaluated          | 12 (85.7%)        | 9 (64.3%)          | 7 (50.0%)         |
| Mean ± SD                             | 57.3 ± 12.2       | 53.3 ± 13.8        | -3.1 ± 1.7        |
| Median (Q1, Q3)                       | 63.5 (43.8, 67.8) | 58.0 (39.0, 64.0)  | -4.0 (-4.0, -2.0) |
| <b>Total (n = 124)</b>                |                   |                    |                   |
| <b>Pre-BT FEV1/FVC (%)</b>            |                   |                    |                   |
| Number of patients evaluated          | 97 (78.2%)        | 93 (75.0%)         | 75 (60.5%)        |
| Mean ± SD                             | 64.0 ± 14.2       | 63.6 ± 13.5        | -1.0 ± 8.0        |
| Median (Q1, Q3)                       | 65.0 (55.0, 74.5) | 63.0 (53.0, 72.0)  | -1.0 (-5.0, 5.0)  |
| <b>Pre-BT FEV1 (L)</b>                |                   |                    |                   |
| Number of patients evaluated          | 97 (78.2%)        | 93 (75.0%)         | 75 (60.5%)        |
| Mean ± SD                             | 1.7 ± 0.7         | 1.8 ± 0.8          | 0.0 ± 0.3         |
| Median (Q1, Q3)                       | 1.7 (1.1, 2.3)    | 1.7 (1.3, 2.4)     | 0.0 (-0.2, 0.2)   |
| <b>Pre-BT FEV1 % predicted</b>        |                   |                    |                   |
| Number of patients evaluated          | 97 (78.2%)        | 93 (75.0%)         | 75 (60.5%)        |
| Mean ± SD                             | 66.0 ± 22.4       | 69.7 ± 21.8        | 1.4 ± 11.9        |
| Median (Q1, Q3)                       | 66.0 (47.5, 79.5) | 69.0 (52.5, 83.5)  | 0.0 (-7.0, 9.0)   |
| <b>Pre-BT FVC (L)</b>                 |                   |                    |                   |
| Number of patients evaluated          | 97 (78.2%)        | 93 (75.0%)         | 75 (60.5%)        |
| Mean ± SD                             | 2.7 ± 0.9         | 2.8 ± 0.9          | 0.1 ± 0.4         |
| Median (Q1, Q3)                       | 2.7 (1.9, 3.3)    | 2.8 (2.2, 3.5)     | 0.1 (-0.2, 0.3)   |
| <b>Pre-BT FVC % predicted</b>         |                   |                    |                   |
| Number of patients evaluated          | 97 (78.2%)        | 93 (75.0%)         | 75 (60.5%)        |
| Mean ± SD                             | 84.5 ± 23.2       | 88.9 ± 22.2        | 2.8 ± 12.9        |
| Median (Q1, Q3)                       | 83.0 (68.5, 97.0) | 89.0 (76.0, 100.5) | 2.0 (-6.0, 12.0)  |
| <b>Pre-BT FEF<sub>25-75</sub>%</b>    |                   |                    |                   |
| Number of patients evaluated          | 97 (78.2%)        | 93 (75.0%)         | 75 (60.5%)        |
| Mean ± SD                             | 54.6 ± 11.7       | 58.4 ± 9.7         | 3.6 ± 5.5         |
| Median (Q1, Q3)                       | 57.0 (45.5, 66.0) | 60.0 (54.0, 66.0)  | 4.0 (-1.0, 6.0)   |

Abbreviations: BT, bronchodilator test; FEF<sub>25-75</sub>%, forced expiratory flow at 25–75%; FEV1, forced expiratory volume in one second; FVC, forced vital capacity; also see Supplementary Table S1.

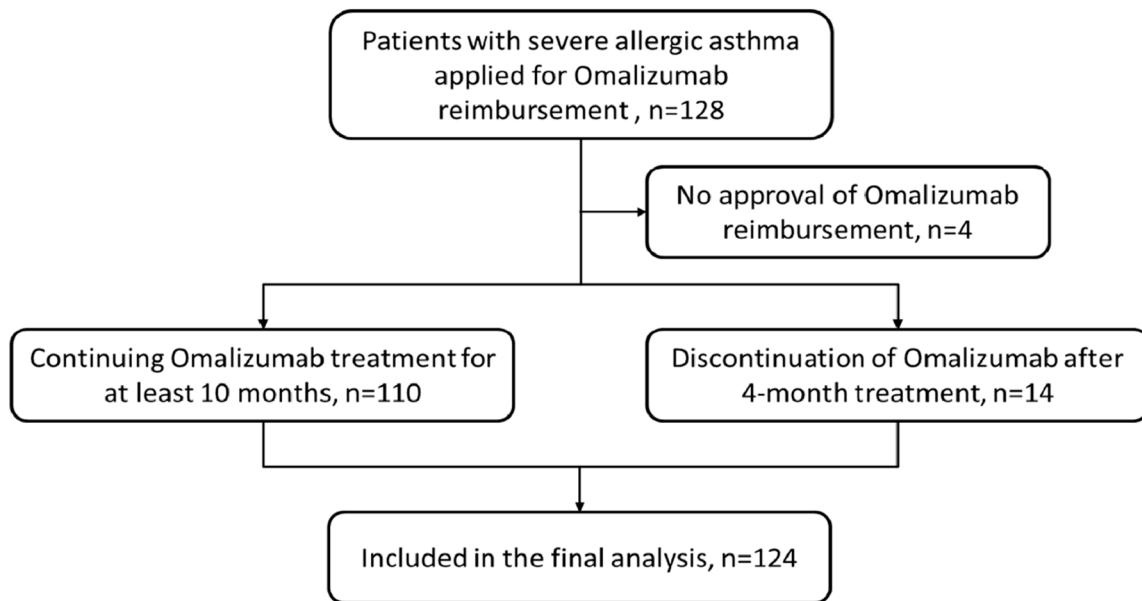

**Figure S1.** The patient enrollment flow chart.

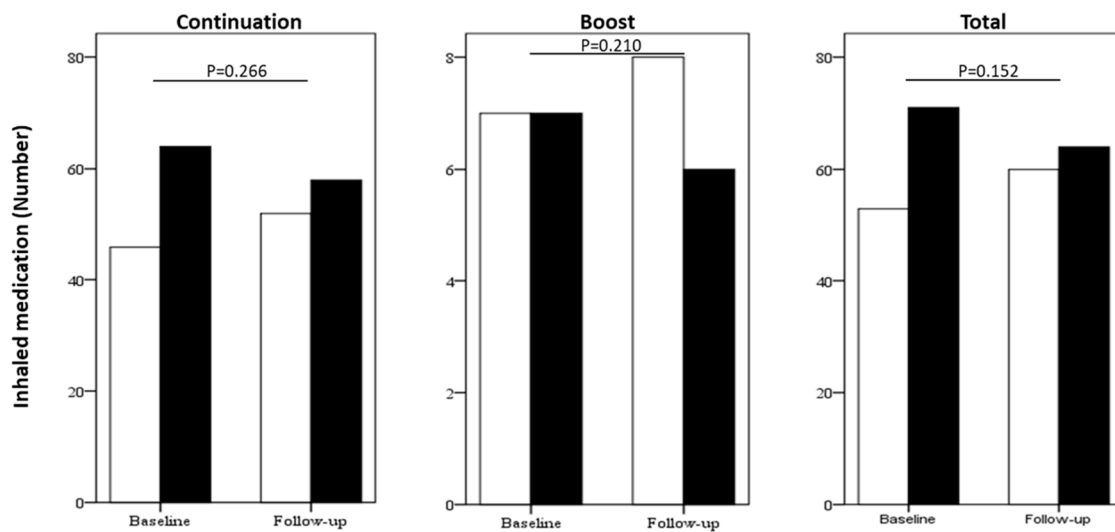

**Figure S2.** The comparison of inhaled maintenance pharmacological therapies between baseline and one-year follow-up. White and black bars represented medium-dose ICS/LABA +/- Tiotropium and high-dose ICS/LABA +/- Tiotropium, respectively. The difference was compared using Chi-square test at a significant difference of P-value < 0.05. Abbreviations: ICS, inhaled corticosteroid; LABA, long-acting beta-agonist.

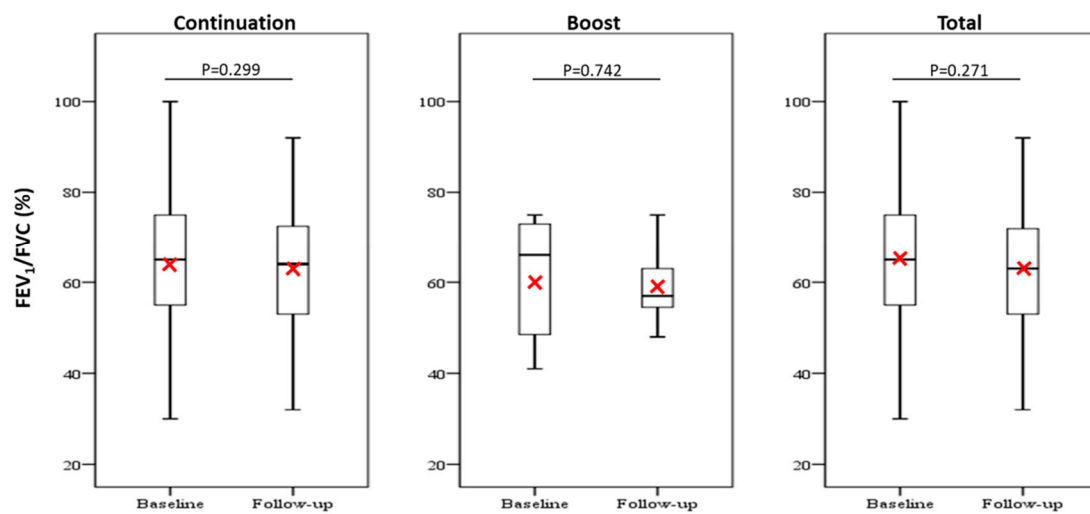

**Figure S3.** The FEV<sub>1</sub>/FVC at baseline and at 12-month follow-up. Red cross represented the mean value. The difference was compared using the cohort whose data were available both at baseline and at 12-month follow-up by paired sample *t*-test or Wilcoxon signed-rank test at a significant difference of *P*-value < 0.05. Abbreviations: FEV<sub>1</sub>, forced expiratory volume in one second; FVC, forced vital capacity.

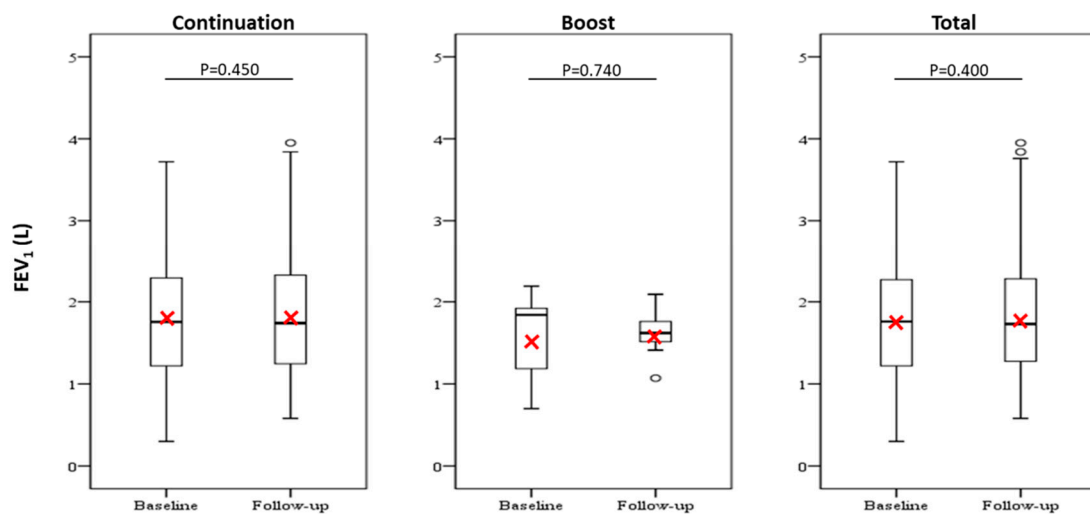

**Figure S4.** The comparison of FEV<sub>1</sub> between baseline and 12-month follow-up. Red cross represented the mean value. The difference was compared using the cohort whose data were available both at baseline and at 12-month follow-up by paired sample *t*-test or Wilcoxon signed-rank test at a significant difference of *P*-value < 0.05. Abbreviations: FEV<sub>1</sub>, forced expiratory volume in one second.

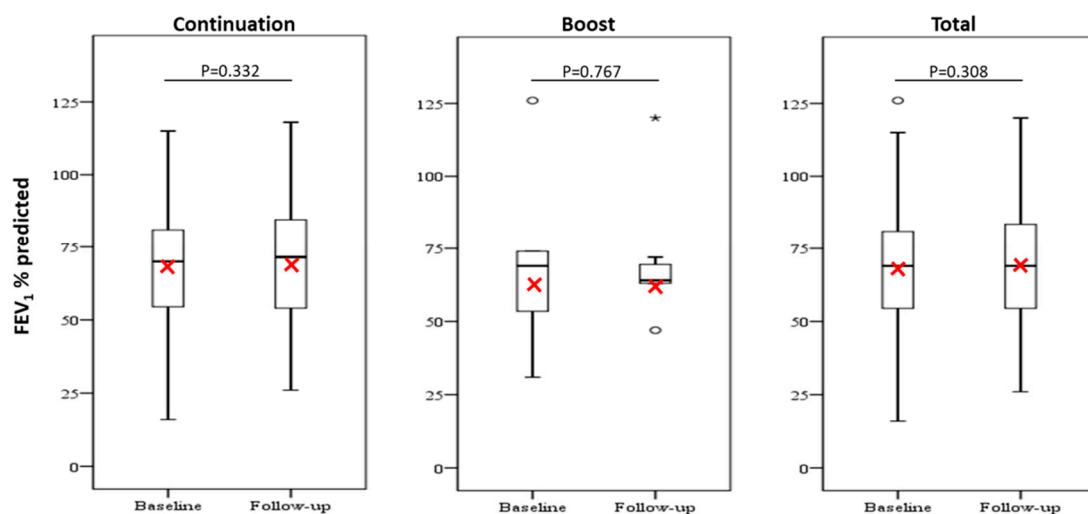

**Figure S5.** The FEV1 % predicted at baseline and at one-year follow-up. Red cross represented the mean value. The difference was compared using the cohort whose data were available both at baseline and at 12-month follow-up by paired sample *t*-test or Wilcoxon signed-rank test at a significant difference of *P*-value < 0.05. Abbreviations: FEV1, forced expiratory volume in one second.

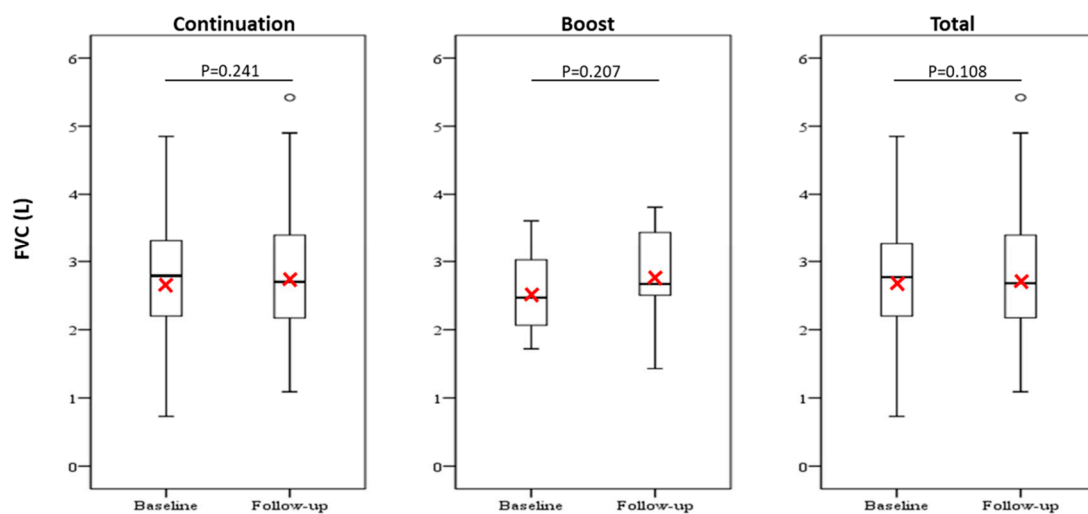

**Figure S6.** The comparison of FVC between baseline and 12-month follow-up. Red cross represented the mean value. The difference was compared using the cohort whose data were available both at baseline and at 12-month follow-up by paired sample *t*-test or Wilcoxon signed-rank test at a significant difference of *P*-value < 0.05. Abbreviations: FVC, forced vital capacity.

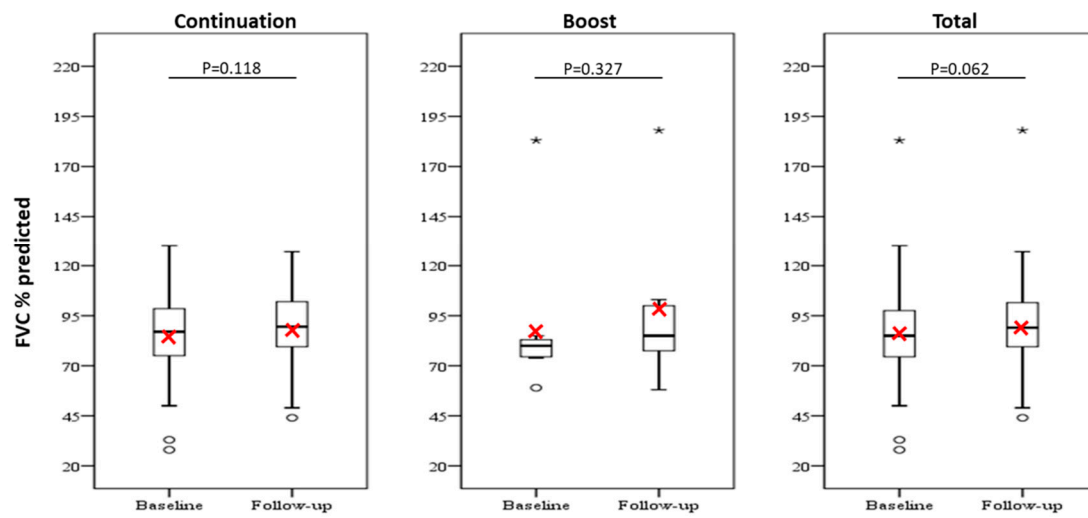

**Figure S7.** The comparison of FVC % predicted between baseline and one-year follow-up. Red cross represented the mean value. The difference was compared using the cohort whose data were available both at baseline and at 12-month follow-up by paired sample *t*-test or Wilcoxon signed-rank test at a significant difference of *P*-value < 0.05. Abbreviations: FVC, forced vital capacity.
